# Supplementary material for: Size and morphology effects on the high pressure behaviors of Mn3O4 nanorods
Source: Royal Society of Chemistry journal article supplement (doi:10.1039/d0na00610f), 2020-01-01
Supplement: d0na00610f1.pdf [file d0na00610f1.pdf]

## Supporting Information

### Size and morphology effects on the high pressure behaviors of $\text{Mn}_3\text{O}_4$ nanorods

Juanying Li<sup>1</sup>, Bo Liu<sup>1</sup>, Junyan Dong<sup>1</sup>, Chenyi Li<sup>1</sup>, Qing Dong<sup>1</sup>, Tao Lin<sup>1</sup>, Ran Liu<sup>1</sup>, Peng Wang<sup>1</sup>, Pengfei Shen<sup>2</sup>, Quanjun Li<sup>1\*</sup>, Bingbing Liu<sup>1\*</sup>

1 *State Key Laboratory of Superhard Materials, College of Physics, Jilin University, No. 2699 Qianjin Street, Changchun 130012, People's Republic of China*

2 *Academy for Advanced Interdisciplinary Studies, Southern University of Science and Technology, Shenzhen, 518055, China*

The corresponding author E-mail: liquanjun@jlu.edu.cn; liubb@jlu.edu.cn

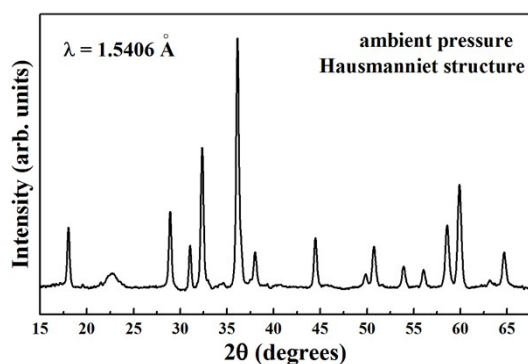

**Figure S1.** (a) XRD pattern of  $\text{Mn}_3\text{O}_4$  nanorods before compression.

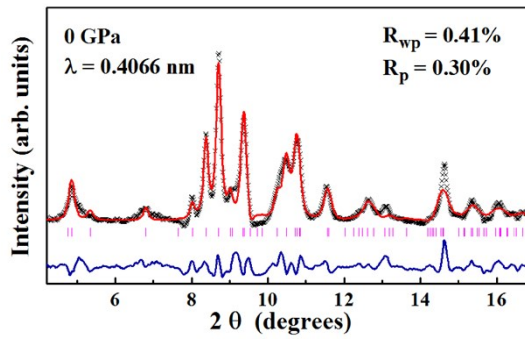

**Figure S2.** XRD data of  $\text{Mn}_3\text{O}_4$  nanorods was released to ambient pressure were refined. Red solid curve is the result of the Rietveld refinement with marokite-like phase (*Pbcm*) model.

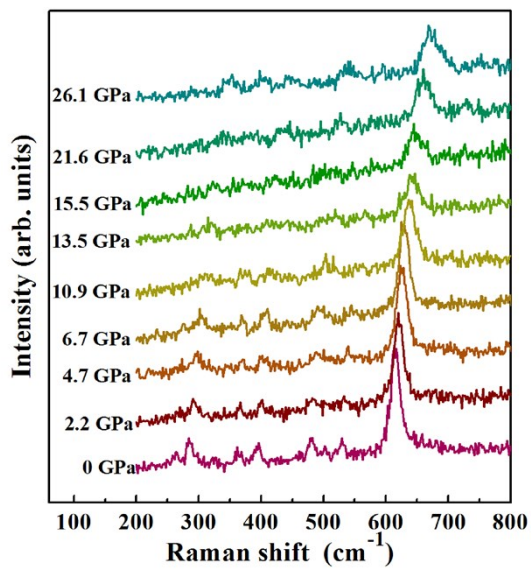

**Figure S3.** Raman spectra of  $\text{Mn}_3\text{O}_4$  nanorods during decompression.
